# Supplementary material
Source: publisher figshare collection journal article supplement (https://acs.figshare.com/ndownloader/files/3587145)
Supplement: Supplementary file 1 [file 3587145]

## Supporting Information for “Formation of Secondary Organic Aerosol from the Direct Photolytic Generation of Organic Radicals”

In order to examine the relative importance of various reaction pathways in the reactive systems studied in this work, we have performed a kinetic simulation of such reactions under the relevant experimental conditions. All reactions (and corresponding rate coefficients) used in this kinetic model are listed in Table S-I. Self-reaction of  $\text{RO}_2$  radicals leads to the production of alcohols, carbonyls, peroxides of the form  $\text{ROOR}$ , and alkoxy radicals,  $\text{RO}$ . The alkoxy radical rapidly isomerizes and reacts with oxygen to form the hydroxy-alkylperoxy radical, which again engages in  $\text{RO}_2$  self-reaction. Reaction of the hydroxy-alkoxy radical with oxygen yields a hydroxycarbonyl compound and  $\text{HO}_2$ ; this radical will react with  $\text{RO}_2$  to form hydroperoxides.

Secondary reactions, which may complicate the reactions described above, are also included in this kinetic model. These focus on the radical abstraction of the hydrogen atom from the parent iodide compound,  $\text{RI}$ , by alkyl, alkylperoxy, alkoxy, and hydroxyl radicals. The hydroxyl radical may be formed by the photolysis of either organic hydroperoxides ( $\text{ROOH}$ ) or hydrogen peroxide ( $\text{H}_2\text{O}_2$ ). Conservatively high rate coefficients for these side reactions are used as upper limits.

The final concentration values of stable (non-radical) products after a 37-second simulation (consistent with the residence time of the reactor) are shown in Table S-II. Species formed by the  $\text{RO}_2$  self-reaction and  $\text{RO}_2+\text{HO}_2$  channels are present at levels at least two orders of magnitude greater than those formed by reactions of the parent molecule with other radicals, which account for <1% of all reactions of  $\text{RI}$ . We are therefore confident that the observed

chemistry arises from the  $R+O_2$  reaction to form  $RO_2$  radicals, followed by  $RO_2+RO_2$  and  $RO_2+HO_2$  reactions, with negligible influence from secondary chemistry.

| #               | Reaction                                                       | Rate Coefficient       | Source              |
|-----------------|----------------------------------------------------------------|------------------------|---------------------|
| 1               | $RI \rightarrow R\cdot + I$                                    | $1.56 \times 10^{-2}$  | (1, 2) <sup>a</sup> |
| 2               | $R\cdot (+ O_2) \rightarrow RO_2\cdot$                         | $1.87 \times 10^4$     | (3)                 |
| 3               | $RO_2 + R'O_2 \rightarrow ROOR' (+ O_2)$                       | $3.84 \times 10^{-15}$ | (3)                 |
| 4               | $RO_2 + RO_2 \rightarrow RO\cdot + RO\cdot (+ O_2)$            | $3.97 \times 10^{-14}$ | (3)                 |
| 5               | $RO_2 + RO_2 \rightarrow ROH + R=O (+ O_2)$                    | $2.04 \times 10^{-14}$ | (3)                 |
| 6               | $(H-)RI + R\cdot \rightarrow \cdot RI + RH$                    | $1.5 \times 10^{-13}$  | (4)                 |
| 7               | $\cdot RI (+ O_2) \rightarrow RIO_2\cdot$                      | $1.87 \times 10^4$     | (3)                 |
| 8               | $R\cdot + R'\cdot \rightarrow R-R'$                            | $5.0 \times 10^{-12}$  | (5) <sup>b</sup>    |
| 9               | $RO_2\cdot + (H-)RI \rightarrow ROOH + \cdot RI$               | $3.90 \times 10^{-19}$ | (5) <sup>b</sup>    |
| 10 <sup>c</sup> | $RO\cdot (+ O_2) \rightarrow R'(OH)R''O_2\cdot$                | $1.5 \times 10^7$      | (6)                 |
| 11              | $R'(OH)R''O\cdot + (O_2) \rightarrow R'(OH)R''(O) + HO_2\cdot$ | $4.7 \times 10^4$      | (3)                 |
| 12              | $RO_2\cdot + HO_2\cdot \rightarrow ROOH (+ O_2)$               | $7.7 \times 10^{-12}$  | (3)                 |
| 13              | $ROOH \rightarrow RO\cdot + \cdot OH$                          | $4.53 \times 10^{-4}$  | (1, 7) <sup>a</sup> |
| 14              | $HO_2\cdot + HO_2\cdot \rightarrow HOOH (+ O_2)$               | $2.84 \times 10^{-12}$ | (8)                 |
| 15              | $HOOH \rightarrow \cdot OH + \cdot OH$                         | $1.16 \times 10^{-3}$  | (1, 9) <sup>a</sup> |
| 16              | $\cdot OH + \cdot OH \rightarrow HOOH$                         | $4.7 \times 10^{-25}$  | (8)                 |
| 17              | $\cdot OH + HO_2\cdot \rightarrow (H_2O + O_2)$                | $1.1 \times 10^{-16}$  | (8)                 |
| 18              | $\cdot OH + (H-)RI \rightarrow \cdot RI + H_2O$                | $1.1 \times 10^{-18}$  | (3)                 |

**Table S-I.** Reactions and rate coefficients used in a simplified photolytic oxidation scheme. (Pseudo-)First-order rate constants (reactions 1, 2, 7, 10, 11, 13, and 15) are in units of  $s^{-1}$ , while all other rate constants have units of  $cm^3 \text{ molecule}^{-1} s^{-1}$ . <sup>a</sup>Photolysis rates are estimated by comparing the absorption cross-sections of ozone ( $1.13 \times 10^{-17} \text{ cm}^2$  (1)) with those of methyl iodide ( $1.11 \times 10^{-18} \text{ cm}^2$  (2)), methyl hydroperoxide ( $3.23 \times 10^{-20} \text{ cm}^2$  (7)), and hydrogen peroxide ( $6.7 \times 10^{-20} \text{ cm}^2$  (9)), as well as a previously-estimated photolysis rate coefficient of ozone of  $0.159 s^{-1}$  in the flow reactor. Quantum yields in all cases are assumed to be unity. <sup>b</sup>Rate coefficients for the self-reaction of alkyl radicals and for H-abstraction by the peroxy radical are estimated from condensed-phase studies (5), adjusted upwards by a factor of 50 as an upper limit for the calculated rate. <sup>c</sup>The hydroxyalkyl radical formed by isomerization in reaction 10 is assumed to immediately form an alkylperoxy radical by reacting with abundant  $O_2$ . Subsequent reactions with other radical species are as described in reactions 3, 4, 5, and 12.

| #  | Species                       | Final Concentration<br>(Fraction of Initial RI) |
|----|-------------------------------|-------------------------------------------------|
| 1  | RI                            | 0.011                                           |
| 2  | RH                            | $5.4 \times 10^{-12}$                           |
| 3  | ROOR'                         | 0.037                                           |
| 4  | ROH                           | 0.196                                           |
| 5  | R=O                           | 0.196                                           |
| 6  | R-R'                          | $2.3 \times 10^{-25}$                           |
| 7  | R(OH)R(=O)                    | 0.252                                           |
| 8  | ROOH                          | 0.152                                           |
| 9  | R(OH)ROOH                     | 0.096                                           |
| 10 | H <sub>2</sub> O <sub>2</sub> | $2.8 \times 10^{-4}$                            |

**Table S-II.** Final concentration values of stable (non-radical) species, as a fraction of the initial concentration of RI, for a simulation of the kinetics described in Table S-I. The reaction time is estimated to be ~37 s (the residence time of the flow reactor used here), and the initial concentration of species RI is given as  $6 \times 10^{13}$  molecule cm<sup>-3</sup>.

- (1) Yoshino, K.; Freeman, D. E.; Esmond, J. R.; Parkinson, W. H. Absolute Absorption Cross-Section Measurements of Ozone in the Wavelength Region 238-335 nm and the Temperature Dependence. *Planetary and Space Science*. **1988**, 36, 395-398.
- (2) Fahr, A.; Nayak, A. K.; Kurylo, M. J. The Ultraviolet Absorption Cross Sections of CH<sub>3</sub>I Temperature Dependent Gas and Liquid Phase Measurements. *Chemical Physics*. **1995**, 197, 195-203.
- (3) Atkinson, R.; Baulch, D. L.; Cox, R. A.; Hampson, R. F.; Kerr, J. A.; Rossi, M. J.; Troe, J. Evaluated Kinetic and Photochemical Data for Atmospheric Chemistry, Organic Species: Supplement VII. *Journal of Physical and Chemical Reference Data*. **1999**, 28, 191.
- (4) Franz, J. A.; Bushaw, B. A.; Alnajjar, M. S. Absolute Rate Expressions for the Abstraction of Hydrogen by Primary, Secondary, and Tertiary Alkyl Radicals from Thiophenol. *Journal of the American Chemical Society*. **1989**, 111, 268-275.
- (5) Kuprowicz, N. J.; Ervin, J. S.; Zabarnick, S. Modeling the Liquid-Phase Oxidation of Hydrocarbons Over a Range of Temperatures and Dissolved Oxygen Concentrations with Pseudo-Detailed Chemical Kinetics. *Fuel*. **2004**, 83, 1795-1801.
- (6) Eberhard J.; Muller C.; Stocker D.; Kerr J. Isomerization of Alkoxy Radicals under Atmospheric Conditions. *Environ. Sci. Technol*. **1995**, 29, 232-241.
- (7) Vaghjiani, G. L., and A. R. Ravishankara. Absorption Cross Sections of CH<sub>3</sub>OOH H<sub>2</sub>O<sub>2</sub>, and D<sub>2</sub>O<sub>2</sub> Vapors Between 210 and 365 nm at 297 K, *J. Geophys. Res.* **1989**, 94, 3487-3492.

- (8) Atkinson, R.; Baulch, D. L.; Cox, R. A.; Hampson, R. F.; Kerr, J. A.; Rossi, M. J.; Troe, J. Evaluated Kinetic and Photochemical Data for Atmospheric Chemistry, Organic Species: Supplement V. *Journal of Physical and Chemical Reference Data*. **1997**, 26, 521.
- (9) Lin, C. L.; Rohatgi, N. K.; DeMore, W. B. Ultraviolet Absorption Cross Sections of Hydrogen Peroxide. *Geophysical Research Letters*. **1978**, 5, 113–115.
